# Supplementary material for: Titin is a nucleolar protein in neurons
Source: Research Square preprint supplement (doi:10.21203/rs.3.rs-4000799/v1), 2024-03-04
Supplement: Supplementary file 1 [file 8c0ac0459063871380340b4b.xlsx]

## Sheet: Mouse
Identified Proteins (178)	Accession Number	Molecular Weight	Mouse Gastrocnemius Muscle	Mouse Brain Upper Band	Mouse Brain Lower Band
Titin OS=Mus musculus OX=10090 GN=Ttn PE=1 SV=1	sp|A2ASS6|TITIN_MOUSE	3906 kDa	4461	2	9
Myosin-4 OS=Mus musculus OX=10090 GN=Myh4 PE=1 SV=1	sp|Q5SX39|MYH4_MOUSE	223 kDa	27	0	0
Actin, alpha cardiac muscle 1 OS=Mus musculus OX=10090 GN=Actc1 PE=1 SV=1	sp|P68033|ACTC_MOUSE	42 kDa	20	24	19
Laminin subunit alpha-2 OS=Mus musculus OX=10090 GN=Lama2 PE=1 SV=2	sp|Q60675|LAMA2_MOUSE	344 kDa	17	0	0
Laminin subunit gamma-1 OS=Mus musculus OX=10090 GN=Lamc1 PE=1 SV=2	sp|P02468|LAMC1_MOUSE	177 kDa	13	0	0
Basement membrane-specific heparan sulfate proteoglycan core protein OS=Mus musculus OX=10090 GN=Hspg2 PE=1 SV=1	sp|Q05793|PGBM_MOUSE	398 kDa	10	0	0
Collagen alpha-1(I) chain OS=Mus musculus OX=10090 GN=Col1a1 PE=1 SV=4	sp|P11087|CO1A1_MOUSE	138 kDa	8	0	0
Laminin subunit beta-1 OS=Mus musculus OX=10090 GN=Lamb1 PE=1 SV=3	sp|P02469|LAMB1_MOUSE	197 kDa	6	0	0
Sarcoplasmic/endoplasmic reticulum calcium ATPase 1 OS=Mus musculus OX=10090 GN=Atp2a1 PE=1 SV=1	sp|Q8R429|AT2A1_MOUSE	109 kDa	6	0	0
Fructose-bisphosphate aldolase A OS=Mus musculus OX=10090 GN=Aldoa PE=1 SV=2	sp|P05064|ALDOA_MOUSE	39 kDa	5	0	3
Creatine kinase M-type OS=Mus musculus OX=10090 GN=Ckm PE=1 SV=1	sp|P07310|KCRM_MOUSE	43 kDa	5	0	0
Glyceraldehyde-3-phosphate dehydrogenase OS=Mus musculus OX=10090 GN=Gapdh PE=1 SV=2	sp|P16858|G3P_MOUSE	36 kDa	5	6	10
Glycogenin-1 OS=Mus musculus OX=10090 GN=Gyg1 PE=1 SV=3	sp|Q9R062|GLYG_MOUSE	37 kDa	5	0	0
Collagen alpha-2(I) chain OS=Mus musculus OX=10090 GN=Col1a2 PE=1 SV=2	sp|Q01149|CO1A2_MOUSE	130 kDa	4	0	0
Obscurin OS=Mus musculus OX=10090 GN=Obscn PE=1 SV=3	sp|A2AAJ9|OBSCN_MOUSE	967 kDa	3	0	0
Myomesin-3 OS=Mus musculus OX=10090 GN=Myom3 PE=1 SV=1	sp|A2ABU4|MYOM3_MOUSE	162 kDa	2	0	0
Desmoplakin OS=Mus musculus OX=10090 GN=Dsp PE=1 SV=1	sp|E9Q557|DESP_MOUSE	333 kDa	2	0	49
Uncharacterized protein C9orf131 homolog OS=Mus musculus OX=10090 PE=2 SV=1	sp|Q3V0E1|CI131_MOUSE	130 kDa	2	0	0
G-protein-signaling modulator 1 OS=Mus musculus OX=10090 GN=Gpsm1 PE=1 SV=3	sp|Q6IR34|GPSM1_MOUSE	74 kDa	2	0	0
Receptor-type tyrosine-protein phosphatase zeta OS=Mus musculus OX=10090 GN=Ptprz1 PE=1 SV=1	sp|B9EKR1|PTPRZ_MOUSE	254 kDa	0	0	4
Ryanodine receptor 2 OS=Mus musculus OX=10090 GN=Ryr2 PE=1 SV=1	sp|E9Q401|RYR2_MOUSE	565 kDa	0	5	0
Plasma membrane calcium-transporting ATPase 1 OS=Mus musculus OX=10090 GN=Atp2b1 PE=1 SV=1	sp|G5E829|AT2B1_MOUSE	135 kDa	0	8	0
Dihydropyrimidinase-related protein 2 OS=Mus musculus OX=10090 GN=Dpysl2 PE=1 SV=2	sp|O08553|DPYL2_MOUSE	62 kDa	0	3	8
Syntaxin-binding protein 1 OS=Mus musculus OX=10090 GN=Stxbp1 PE=1 SV=2	sp|O08599|STXB1_MOUSE	68 kDa	0	2	2
Peroxiredoxin-6 OS=Mus musculus OX=10090 GN=Prdx6 PE=1 SV=3	sp|O08709|PRDX6_MOUSE	25 kDa	0	0	6
60S ribosomal protein L35a OS=Mus musculus OX=10090 GN=Rpl35a PE=1 SV=2	sp|O55142|RL35A_MOUSE	13 kDa	0	0	4
14-3-3 protein sigma OS=Mus musculus OX=10090 GN=Sfn PE=1 SV=2	sp|O70456|1433S_MOUSE	28 kDa	0	0	17
Heterogeneous nuclear ribonucleoproteins A2/B1 OS=Mus musculus OX=10090 GN=Hnrnpa2b1 PE=1 SV=2	sp|O88569|ROA2_MOUSE	37 kDa	0	0	4
Protein bassoon OS=Mus musculus OX=10090 GN=Bsn PE=1 SV=4	sp|O88737|BSN_MOUSE	419 kDa	0	5	0
Histone H3.3C OS=Mus musculus OX=10090 GN=H3-5 PE=3 SV=3	sp|P02301|H3C_MOUSE (+3)	15 kDa	0	0	5
Myoglobin OS=Mus musculus OX=10090 GN=Mb PE=1 SV=3	sp|P04247|MYG_MOUSE	17 kDa	0	3	3
Aspartate aminotransferase, mitochondrial OS=Mus musculus OX=10090 GN=Got2 PE=1 SV=1	sp|P05202|AATM_MOUSE	47 kDa	0	2	3
Heat shock protein HSP 90-alpha OS=Mus musculus OX=10090 GN=Hsp90aa1 PE=1 SV=4	sp|P07901|HS90A_MOUSE	85 kDa	0	0	3
Malate dehydrogenase, mitochondrial OS=Mus musculus OX=10090 GN=Mdh2 PE=1 SV=3	sp|P08249|MDHM_MOUSE	36 kDa	0	0	14
Protein disulfide-isomerase OS=Mus musculus OX=10090 GN=P4hb PE=1 SV=2	sp|P09103|PDIA1_MOUSE	57 kDa	0	0	2
Phosphoglycerate kinase 1 OS=Mus musculus OX=10090 GN=Pgk1 PE=1 SV=4	sp|P09411|PGK1_MOUSE	45 kDa	0	0	3
Polyubiquitin-B OS=Mus musculus OX=10090 GN=Ubb PE=2 SV=1	sp|P0CG49|UBB_MOUSE (+3)	34 kDa	0	0	2
Elongation factor 1-alpha 1 OS=Mus musculus OX=10090 GN=Eef1a1 PE=1 SV=3	sp|P10126|EF1A1_MOUSE	50 kDa	0	2	11
Histone H2B type 1-M OS=Mus musculus OX=10090 GN=H2bc14 PE=1 SV=2	sp|P10854|H2B1M_MOUSE (+3)	14 kDa	0	0	13
Histone H1.0 OS=Mus musculus OX=10090 GN=H1-0 PE=2 SV=4	sp|P10922|H10_MOUSE	21 kDa	0	0	2
Heat shock protein HSP 90-beta OS=Mus musculus OX=10090 GN=Hsp90ab1 PE=1 SV=3	sp|P11499|HS90B_MOUSE	83 kDa	0	2	2
Calcium/calmodulin-dependent protein kinase type II subunit alpha OS=Mus musculus OX=10090 GN=Camk2a PE=1 SV=2	sp|P11798|KCC2A_MOUSE	54 kDa	0	0	11
Neural cell adhesion molecule 1 OS=Mus musculus OX=10090 GN=Ncam1 PE=1 SV=3	sp|P13595|NCAM1_MOUSE	119 kDa	0	4	0
Sodium/potassium-transporting ATPase subunit beta-1 OS=Mus musculus OX=10090 GN=Atp1b1 PE=1 SV=1	sp|P14094|AT1B1_MOUSE	35 kDa	0	0	3
40S ribosomal protein S16 OS=Mus musculus OX=10090 GN=Rps16 PE=1 SV=4	sp|P14131|RS16_MOUSE	16 kDa	0	0	3
60S ribosomal protein L7 OS=Mus musculus OX=10090 GN=Rpl7 PE=1 SV=2	sp|P14148|RL7_MOUSE	31 kDa	0	0	3
40S ribosomal protein SA OS=Mus musculus OX=10090 GN=Rpsa PE=1 SV=4	sp|P14206|RSSA_MOUSE	33 kDa	0	0	5
Heat shock protein beta-1 OS=Mus musculus OX=10090 GN=Hspb1 PE=1 SV=3	sp|P14602|HSPB1_MOUSE	23 kDa	0	0	3
Lamin-B1 OS=Mus musculus OX=10090 GN=Lmnb1 PE=1 SV=3	sp|P14733|LMNB1_MOUSE	67 kDa	0	0	4
60S acidic ribosomal protein P0 OS=Mus musculus OX=10090 GN=Rplp0 PE=1 SV=3	sp|P14869|RLA0_MOUSE	34 kDa	0	0	3
Glutamine synthetase OS=Mus musculus OX=10090 GN=Glul PE=1 SV=6	sp|P15105|GLNA_MOUSE	42 kDa	0	0	2
Galectin-3 OS=Mus musculus OX=10090 GN=Lgals3 PE=1 SV=3	sp|P16110|LEG3_MOUSE	28 kDa	0	0	3
L-lactate dehydrogenase B chain OS=Mus musculus OX=10090 GN=Ldhb PE=1 SV=2	sp|P16125|LDHB_MOUSE	37 kDa	0	0	5
Putative ATP-dependent RNA helicase Pl10 OS=Mus musculus OX=10090 GN=D1Pas1 PE=1 SV=1	sp|P16381|DDX3L_MOUSE (+1)	73 kDa	0	0	2
Alpha-enolase OS=Mus musculus OX=10090 GN=Eno1 PE=1 SV=3	sp|P17182|ENOA_MOUSE	47 kDa	0	2	6
Methanethiol oxidase OS=Mus musculus OX=10090 GN=Selenbp1 PE=1 SV=2	sp|P17563|SBP1_MOUSE (+1)	53 kDa	0	0	5
Hexokinase-1 OS=Mus musculus OX=10090 GN=Hk1 PE=1 SV=3	sp|P17710|HXK1_MOUSE	108 kDa	0	5	3
Peptidyl-prolyl cis-trans isomerase A OS=Mus musculus OX=10090 GN=Ppia PE=1 SV=2	sp|P17742|PPIA_MOUSE	18 kDa	0	0	5
Heat shock 70 kDa protein 1B OS=Mus musculus OX=10090 GN=Hspa1b PE=1 SV=3	sp|P17879|HS71B_MOUSE (+1)	70 kDa	0	0	9
Cofilin-1 OS=Mus musculus OX=10090 GN=Cfl1 PE=1 SV=3	sp|P18760|COF1_MOUSE	19 kDa	0	0	2
Troponin C, slow skeletal and cardiac muscles OS=Mus musculus OX=10090 GN=Tnnc1 PE=1 SV=1	sp|P19123|TNNC1_MOUSE	18 kDa	0	2	0
60S ribosomal protein L13a OS=Mus musculus OX=10090 GN=Rpl13a PE=1 SV=4	sp|P19253|RL13A_MOUSE	23 kDa	0	0	3
Endoplasmic reticulum chaperone BiP OS=Mus musculus OX=10090 GN=Hspa5 PE=1 SV=3	sp|P20029|BIP_MOUSE	72 kDa	0	0	10
40S ribosomal protein S2 OS=Mus musculus OX=10090 GN=Rps2 PE=1 SV=3	sp|P25444|RS2_MOUSE	31 kDa	0	0	3
Ezrin OS=Mus musculus OX=10090 GN=Ezr PE=1 SV=3	sp|P26040|EZRI_MOUSE	69 kDa	0	0	3
Small nuclear ribonucleoprotein-associated protein B OS=Mus musculus OX=10090 GN=Snrpb PE=1 SV=1	sp|P27048|RSMB_MOUSE (+1)	24 kDa	0	0	2
Calcium/calmodulin-dependent protein kinase type II subunit beta OS=Mus musculus OX=10090 GN=Camk2b PE=1 SV=2	sp|P28652|KCC2B_MOUSE	60 kDa	0	0	13
Polyadenylate-binding protein 1 OS=Mus musculus OX=10090 GN=Pabpc1 PE=1 SV=2	sp|P29341|PABP1_MOUSE	71 kDa	0	0	9
Creatine kinase U-type, mitochondrial OS=Mus musculus OX=10090 GN=Ckmt1 PE=1 SV=1	sp|P30275|KCRU_MOUSE	47 kDa	0	0	2
Sodium- and chloride-dependent GABA transporter 3 OS=Mus musculus OX=10090 GN=Slc6a11 PE=1 SV=2	sp|P31650|S6A11_MOUSE	70 kDa	0	2	0
60S ribosomal protein L12 OS=Mus musculus OX=10090 GN=Rpl12 PE=1 SV=2	sp|P35979|RL12_MOUSE	18 kDa	0	0	3
60S ribosomal protein L18 OS=Mus musculus OX=10090 GN=Rpl18 PE=1 SV=3	sp|P35980|RL18_MOUSE	22 kDa	0	0	3
Tyrosine-protein kinase Fyn OS=Mus musculus OX=10090 GN=Fyn PE=1 SV=4	sp|P39688|FYN_MOUSE	61 kDa	0	0	3
Excitatory amino acid transporter 2 OS=Mus musculus OX=10090 GN=Slc1a2 PE=1 SV=1	sp|P43006|EAA2_MOUSE	62 kDa	0	6	2
Histone H1.4 OS=Mus musculus OX=10090 GN=H1-4 PE=1 SV=2	sp|P43274|H14_MOUSE	22 kDa	0	0	8
Histone H1.5 OS=Mus musculus OX=10090 GN=H1-5 PE=1 SV=2	sp|P43276|H15_MOUSE	23 kDa	0	0	3
Vesicle-fusing ATPase OS=Mus musculus OX=10090 GN=Nsf PE=1 SV=2	sp|P46460|NSF_MOUSE	83 kDa	0	0	3
60S ribosomal protein L13 OS=Mus musculus OX=10090 GN=Rpl13 PE=1 SV=3	sp|P47963|RL13_MOUSE	24 kDa	0	0	2
60S ribosomal protein L36 OS=Mus musculus OX=10090 GN=Rpl36 PE=1 SV=2	sp|P47964|RL36_MOUSE	12 kDa	0	0	2
Prelamin-A/C OS=Mus musculus OX=10090 GN=Lmna PE=1 SV=2	sp|P48678|LMNA_MOUSE	74 kDa	0	0	11
ADP/ATP translocase 1 OS=Mus musculus OX=10090 GN=Slc25a4 PE=1 SV=4	sp|P48962|ADT1_MOUSE	33 kDa	0	5	2
Heterogeneous nuclear ribonucleoprotein A1 OS=Mus musculus OX=10090 GN=Hnrnpa1 PE=1 SV=2	sp|P49312|ROA1_MOUSE	34 kDa	0	0	3
Adenosylhomocysteinase OS=Mus musculus OX=10090 GN=Ahcy PE=1 SV=3	sp|P50247|SAHH_MOUSE	48 kDa	0	0	2
Rab GDP dissociation inhibitor alpha OS=Mus musculus OX=10090 GN=Gdi1 PE=1 SV=3	sp|P50396|GDIA_MOUSE	51 kDa	0	0	5
Pyruvate kinase PKM OS=Mus musculus OX=10090 GN=Pkm PE=1 SV=4	sp|P52480|KPYM_MOUSE	58 kDa	0	3	5
60S ribosomal protein L10a OS=Mus musculus OX=10090 GN=Rpl10a PE=1 SV=3	sp|P53026|RL10A_MOUSE	25 kDa	0	0	3
ATP synthase subunit beta, mitochondrial OS=Mus musculus OX=10090 GN=Atp5f1b PE=1 SV=2	sp|P56480|ATPB_MOUSE	56 kDa	0	2	6
Elongation factor 2 OS=Mus musculus OX=10090 GN=Eef2 PE=1 SV=2	sp|P58252|EF2_MOUSE	95 kDa	0	0	11
Poly(rC)-binding protein 1 OS=Mus musculus OX=10090 GN=Pcbp1 PE=1 SV=1	sp|P60335|PCBP1_MOUSE	37 kDa	0	0	5
Eukaryotic initiation factor 4A-I OS=Mus musculus OX=10090 GN=Eif4a1 PE=1 SV=1	sp|P60843|IF4A1_MOUSE	46 kDa	0	0	6
60S ribosomal protein L26 OS=Mus musculus OX=10090 GN=Rpl26 PE=1 SV=1	sp|P61255|RL26_MOUSE	17 kDa	0	0	2
60S ribosomal protein L27 OS=Mus musculus OX=10090 GN=Rpl27 PE=1 SV=2	sp|P61358|RL27_MOUSE	16 kDa	0	0	2
14-3-3 protein gamma OS=Mus musculus OX=10090 GN=Ywhag PE=1 SV=2	sp|P61982|1433G_MOUSE	28 kDa	0	0	9
40S ribosomal protein S7 OS=Mus musculus OX=10090 GN=Rps7 PE=1 SV=1	sp|P62082|RS7_MOUSE	22 kDa	0	0	4
40S ribosomal protein S8 OS=Mus musculus OX=10090 GN=Rps8 PE=1 SV=2	sp|P62242|RS8_MOUSE	24 kDa	0	0	2
40S ribosomal protein S15a OS=Mus musculus OX=10090 GN=Rps15a PE=1 SV=2	sp|P62245|RS15A_MOUSE	15 kDa	0	0	2
14-3-3 protein epsilon OS=Mus musculus OX=10090 GN=Ywhae PE=1 SV=1	sp|P62259|1433E_MOUSE	29 kDa	0	0	5
40S ribosomal protein S14 OS=Mus musculus OX=10090 GN=Rps14 PE=1 SV=3	sp|P62264|RS14_MOUSE	16 kDa	0	0	2
40S ribosomal protein S18 OS=Mus musculus OX=10090 GN=Rps18 PE=1 SV=3	sp|P62270|RS18_MOUSE	18 kDa	0	0	3
40S ribosomal protein S11 OS=Mus musculus OX=10090 GN=Rps11 PE=1 SV=3	sp|P62281|RS11_MOUSE	18 kDa	0	0	4
40S ribosomal protein S13 OS=Mus musculus OX=10090 GN=Rps13 PE=1 SV=2	sp|P62301|RS13_MOUSE	17 kDa	0	0	2
40S ribosomal protein S4, X isoform OS=Mus musculus OX=10090 GN=Rps4x PE=1 SV=2	sp|P62702|RS4X_MOUSE	30 kDa	0	0	5
60S ribosomal protein L18a OS=Mus musculus OX=10090 GN=Rpl18a PE=1 SV=1	sp|P62717|RL18A_MOUSE	21 kDa	0	0	2
Histone H4 OS=Mus musculus OX=10090 GN=H4c16 PE=1 SV=2	sp|P62806|H4_MOUSE	11 kDa	0	0	10
GTP-binding nuclear protein Ran OS=Mus musculus OX=10090 GN=Ran PE=1 SV=3	sp|P62827|RAN_MOUSE	24 kDa	0	0	2
40S ribosomal protein S25 OS=Mus musculus OX=10090 GN=Rps25 PE=1 SV=1	sp|P62852|RS25_MOUSE	14 kDa	0	0	3
40S ribosomal protein S26 OS=Mus musculus OX=10090 GN=Rps26 PE=1 SV=3	sp|P62855|RS26_MOUSE	13 kDa	0	0	2
Guanine nucleotide-binding protein G(I)/G(S)/G(T) subunit beta-1 OS=Mus musculus OX=10090 GN=Gnb1 PE=1 SV=3	sp|P62874|GBB1_MOUSE	37 kDa	0	4	5
60S ribosomal protein L30 OS=Mus musculus OX=10090 GN=Rpl30 PE=1 SV=2	sp|P62889|RL30_MOUSE	13 kDa	0	0	3
40S ribosomal protein S3 OS=Mus musculus OX=10090 GN=Rps3 PE=1 SV=1	sp|P62908|RS3_MOUSE	27 kDa	0	0	7
60S ribosomal protein L8 OS=Mus musculus OX=10090 GN=Rpl8 PE=1 SV=2	sp|P62918|RL8_MOUSE	28 kDa	0	0	2
Heat shock cognate 71 kDa protein OS=Mus musculus OX=10090 GN=Hspa8 PE=1 SV=1	sp|P63017|HSP7C_MOUSE	71 kDa	0	5	11
Actin, cytoplasmic 2 OS=Mus musculus OX=10090 GN=Actg1 PE=1 SV=1	sp|P63260|ACTG_MOUSE	42 kDa	0	0	21
40S ribosomal protein S10 OS=Mus musculus OX=10090 GN=Rps10 PE=1 SV=1	sp|P63325|RS10_MOUSE	19 kDa	0	0	2
Protein phosphatase 3 catalytic subunit alpha OS=Mus musculus OX=10090 GN=Ppp3ca PE=1 SV=1	sp|P63328|PP2BA_MOUSE	59 kDa	0	0	2
60S ribosomal protein L22 OS=Mus musculus OX=10090 GN=Rpl22 PE=1 SV=2	sp|P67984|RL22_MOUSE	15 kDa	0	0	2
Receptor of activated protein C kinase 1 OS=Mus musculus OX=10090 GN=Rack1 PE=1 SV=3	sp|P68040|RACK1_MOUSE	35 kDa	0	0	6
Actin, alpha skeletal muscle OS=Mus musculus OX=10090 GN=Acta1 PE=1 SV=1	sp|P68134|ACTS_MOUSE	42 kDa	0	23	0
Tubulin beta-4B chain OS=Mus musculus OX=10090 GN=Tubb4b PE=1 SV=1	sp|P68372|TBB4B_MOUSE	50 kDa	0	0	16
Tubulin alpha-1C chain OS=Mus musculus OX=10090 GN=Tuba1c PE=1 SV=1	sp|P68373|TBA1C_MOUSE	50 kDa	0	5	20
Serpin B5 OS=Mus musculus OX=10090 GN=Serpinb5 PE=1 SV=1	sp|P70124|SPB5_MOUSE	42 kDa	0	0	2
Importin subunit beta-1 OS=Mus musculus OX=10090 GN=Kpnb1 PE=1 SV=2	sp|P70168|IMB1_MOUSE	97 kDa	0	0	3
Plakophilin-1 OS=Mus musculus OX=10090 GN=Pkp1 PE=1 SV=1	sp|P97350|PKP1_MOUSE	81 kDa	0	0	10
40S ribosomal protein S3a OS=Mus musculus OX=10090 GN=Rps3a PE=1 SV=3	sp|P97351|RS3A_MOUSE	30 kDa	0	0	3
40S ribosomal protein S5 OS=Mus musculus OX=10090 GN=Rps5 PE=1 SV=3	sp|P97461|RS5_MOUSE	23 kDa	0	0	2
Transitional endoplasmic reticulum ATPase OS=Mus musculus OX=10090 GN=Vcp PE=1 SV=4	sp|Q01853|TERA_MOUSE	89 kDa	0	0	6
Catenin beta-1 OS=Mus musculus OX=10090 GN=Ctnnb1 PE=1 SV=1	sp|Q02248|CTNB1_MOUSE	85 kDa	0	0	7
Junction plakoglobin OS=Mus musculus OX=10090 GN=Jup PE=1 SV=3	sp|Q02257|PLAK_MOUSE	82 kDa	0	0	26
ATP synthase subunit alpha, mitochondrial OS=Mus musculus OX=10090 GN=Atp5f1a PE=1 SV=1	sp|Q03265|ATPA_MOUSE	60 kDa	0	0	4
Creatine kinase B-type OS=Mus musculus OX=10090 GN=Ckb PE=1 SV=1	sp|Q04447|KCRB_MOUSE	43 kDa	0	0	3
EF-hand calcium-binding domain-containing protein 4B OS=Mus musculus OX=10090 GN=Cracr2a PE=2 SV=2	sp|Q3UP38|EFC4B_MOUSE	83 kDa	0	0	2
Keratin-associated protein 9-3 OS=Mus musculus OX=10090 GN=Krtap9-3 PE=2 SV=1	sp|Q3V2C1|KRA93_MOUSE	14 kDa	0	0	5
Aggrecan core protein OS=Mus musculus OX=10090 GN=Acan PE=1 SV=2	sp|Q61282|PGCA_MOUSE	222 kDa	0	5	3
Inter-alpha-trypsin inhibitor heavy chain H3 OS=Mus musculus OX=10090 GN=Itih3 PE=1 SV=3	sp|Q61704|ITIH3_MOUSE	99 kDa	0	2	0
Versican core protein OS=Mus musculus OX=10090 GN=Vcan PE=1 SV=2	sp|Q62059|CSPG2_MOUSE	367 kDa	0	4	0
Histone H2A type 2-C OS=Mus musculus OX=10090 GN=H2ac20 PE=1 SV=3	sp|Q64523|H2A2C_MOUSE (+1)	14 kDa	0	0	8
Clathrin heavy chain 1 OS=Mus musculus OX=10090 GN=Cltc PE=1 SV=3	sp|Q68FD5|CLH1_MOUSE	192 kDa	0	5	4
Sorcin OS=Mus musculus OX=10090 GN=Sri PE=1 SV=1	sp|Q6P069|SORCN_MOUSE	22 kDa	0	0	2
Sodium/potassium-transporting ATPase subunit alpha-3 OS=Mus musculus OX=10090 GN=Atp1a3 PE=1 SV=1	sp|Q6PIC6|AT1A3_MOUSE	112 kDa	0	16	18
Sodium/potassium-transporting ATPase subunit alpha-2 OS=Mus musculus OX=10090 GN=Atp1a2 PE=1 SV=1	sp|Q6PIE5|AT1A2_MOUSE	112 kDa	0	12	10
40S ribosomal protein S9 OS=Mus musculus OX=10090 GN=Rps9 PE=1 SV=3	sp|Q6ZWN5|RS9_MOUSE	23 kDa	0	0	3
Desmoglein-4 OS=Mus musculus OX=10090 GN=Dsg4 PE=1 SV=1	sp|Q7TMD7|DSG4_MOUSE	114 kDa	0	0	6
Tubulin beta-2A chain OS=Mus musculus OX=10090 GN=Tubb2a PE=1 SV=1	sp|Q7TMM9|TBB2A_MOUSE	50 kDa	0	7	22
Leucine-rich repeat-containing protein 15 OS=Mus musculus OX=10090 GN=Lrrc15 PE=2 SV=1	sp|Q80X72|LRC15_MOUSE	64 kDa	0	0	4
Casein kinase I isoform alpha OS=Mus musculus OX=10090 GN=Csnk1a1 PE=1 SV=2	sp|Q8BK63|KC1A_MOUSE	39 kDa	0	0	3
60S ribosomal protein L24 OS=Mus musculus OX=10090 GN=Rpl24 PE=1 SV=2	sp|Q8BP67|RL24_MOUSE	18 kDa	0	0	2
Tenascin-R OS=Mus musculus OX=10090 GN=Tnr PE=1 SV=2	sp|Q8BYI9|TENR_MOUSE	150 kDa	0	9	13
Sodium/potassium-transporting ATPase subunit alpha-1 OS=Mus musculus OX=10090 GN=Atp1a1 PE=1 SV=1	sp|Q8VDN2|AT1A1_MOUSE	113 kDa	0	9	10
Splicing factor, proline- and glutamine-rich OS=Mus musculus OX=10090 GN=Sfpq PE=1 SV=1	sp|Q8VIJ6|SFPQ_MOUSE	75 kDa	0	0	2
RNA binding motif protein, X-linked-like-1 OS=Mus musculus OX=10090 GN=Rbmxl1 PE=2 SV=1	sp|Q91VM5|RMXL1_MOUSE (+1)	42 kDa	0	0	2
Calcium/calmodulin-dependent protein kinase type II subunit gamma OS=Mus musculus OX=10090 GN=Camk2g PE=1 SV=1	sp|Q923T9|KCC2G_MOUSE	60 kDa	0	0	11
Aconitate hydratase, mitochondrial OS=Mus musculus OX=10090 GN=Aco2 PE=1 SV=1	sp|Q99KI0|ACON_MOUSE	85 kDa	0	2	8
Myeloid leukemia factor 2 OS=Mus musculus OX=10090 GN=Mlf2 PE=1 SV=1	sp|Q99KX1|MLF2_MOUSE	28 kDa	0	0	4
Parkinson disease protein 7 homolog OS=Mus musculus OX=10090 GN=Park7 PE=1 SV=1	sp|Q99LX0|PARK7_MOUSE	20 kDa	0	0	2
Cytosol aminopeptidase OS=Mus musculus OX=10090 GN=Lap3 PE=1 SV=3	sp|Q9CPY7|AMPL_MOUSE	56 kDa	0	0	3
60S ribosomal protein L11 OS=Mus musculus OX=10090 GN=Rpl11 PE=1 SV=4	sp|Q9CXW4|RL11_MOUSE	20 kDa	0	0	5
Cytochrome b-c1 complex subunit 1, mitochondrial OS=Mus musculus OX=10090 GN=Uqcrc1 PE=1 SV=2	sp|Q9CZ13|QCR1_MOUSE	53 kDa	0	0	2
Citrate synthase, mitochondrial OS=Mus musculus OX=10090 GN=Cs PE=1 SV=1	sp|Q9CZU6|CISY_MOUSE	52 kDa	0	0	3
Heterogeneous nuclear ribonucleoprotein M OS=Mus musculus OX=10090 GN=Hnrnpm PE=1 SV=3	sp|Q9D0E1|HNRPM_MOUSE	78 kDa	0	0	2
60S ribosomal protein L34 OS=Mus musculus OX=10090 GN=Rpl34 PE=1 SV=2	sp|Q9D1R9|RL34_MOUSE	13 kDa	0	0	2
60S ribosomal protein L4 OS=Mus musculus OX=10090 GN=Rpl4 PE=1 SV=3	sp|Q9D8E6|RL4_MOUSE	47 kDa	0	0	3
Elongation factor 1-gamma OS=Mus musculus OX=10090 GN=Eef1g PE=1 SV=3	sp|Q9D8N0|EF1G_MOUSE	50 kDa	0	0	6
Eukaryotic translation initiation factor 3 subunit F OS=Mus musculus OX=10090 GN=Eif3f PE=1 SV=2	sp|Q9DCH4|EIF3F_MOUSE	38 kDa	0	0	3
Gasdermin-A OS=Mus musculus OX=10090 GN=Gsdma PE=1 SV=1	sp|Q9EST1|GSDMA_MOUSE	50 kDa	0	0	2
Cytoplasmic dynein 1 heavy chain 1 OS=Mus musculus OX=10090 GN=Dync1h1 PE=1 SV=2	sp|Q9JHU4|DYHC1_MOUSE	532 kDa	0	7	2
Heat shock protein beta-8 OS=Mus musculus OX=10090 GN=Hspb8 PE=1 SV=1	sp|Q9JK92|HSPB8_MOUSE	22 kDa	0	0	2
Dual specificity protein phosphatase 14 OS=Mus musculus OX=10090 GN=Dusp14 PE=2 SV=2	sp|Q9JLY7|DUS14_MOUSE	22 kDa	0	0	2
Casein kinase I isoform epsilon OS=Mus musculus OX=10090 GN=Csnk1e PE=1 SV=2	sp|Q9JMK2|KC1E_MOUSE	47 kDa	0	0	3
Hyaluronan and proteoglycan link protein 1 OS=Mus musculus OX=10090 GN=Hapln1 PE=1 SV=1	sp|Q9QUP5|HPLN1_MOUSE	40 kDa	0	8	0
Kinesin-like protein KIF21B OS=Mus musculus OX=10090 GN=Kif21b PE=1 SV=2	sp|Q9QXL1|KI21B_MOUSE	186 kDa	0	0	2
Plectin OS=Mus musculus OX=10090 GN=Plec PE=1 SV=3	sp|Q9QXS1|PLEC_MOUSE	534 kDa	0	9	5
Plakophilin-3 OS=Mus musculus OX=10090 GN=Pkp3 PE=1 SV=2	sp|Q9QY23|PKP3_MOUSE	87 kDa	0	0	7
Microtubule-associated protein 1A OS=Mus musculus OX=10090 GN=Map1a PE=1 SV=2	sp|Q9QYR6|MAP1A_MOUSE	300 kDa	0	2	0
Protein piccolo OS=Mus musculus OX=10090 GN=Pclo PE=1 SV=4	sp|Q9QYX7|PCLO_MOUSE	551 kDa	0	2	0
Plasma membrane calcium-transporting ATPase 2 OS=Mus musculus OX=10090 GN=Atp2b2 PE=1 SV=2	sp|Q9R0K7|AT2B2_MOUSE	133 kDa	0	10	2
Destrin OS=Mus musculus OX=10090 GN=Dstn PE=1 SV=3	sp|Q9R0P5|DEST_MOUSE	19 kDa	0	0	2
Periplakin OS=Mus musculus OX=10090 GN=Ppl PE=1 SV=1	sp|Q9R269|PEPL_MOUSE	204 kDa	0	0	2
Keratin, type II cuticular Hb5 OS=Mus musculus OX=10090 GN=Krt85 PE=1 SV=2	sp|Q9Z2T6|KRT85_MOUSE	56 kDa	0	0	57

## Sheet: Rabbit
Identified Proteins (33)	Accession Number	Molecular Weight	Rabbit Upper Band	Rabbit Lower Band
Titin OS=Oryctolagus cuniculus OX=9986 PE=4 SV=1	tr|A0A5F9CAU8|A0A5F9CAU8_RABIT	304 kDa	22	57
Laminin subunit alpha 2 OS=Oryctolagus cuniculus OX=9986 GN=LAMA2 PE=4 SV=2	tr|G1SX80|G1SX80_RABIT	344 kDa	0	57
Laminin subunit beta 1 OS=Oryctolagus cuniculus OX=9986 GN=LAMB1 PE=4 SV=3	tr|G1T7X6|G1T7X6_RABIT	192 kDa	0	38
Sarcoplasmic/endoplasmic reticulum calcium ATPase 1 OS=Oryctolagus cuniculus OX=9986 GN=ATP2A1 PE=1 SV=1	sp|P04191|AT2A1_RABIT (+2)	110 kDa	27	37
Laminin subunit gamma 1 OS=Oryctolagus cuniculus OX=9986 GN=LAMC1 PE=4 SV=1	tr|A0A5F9CMY3|A0A5F9CMY3_RABIT (+2)	105 kDa	0	24
Actin, aortic smooth muscle OS=Oryctolagus cuniculus OX=9986 GN=ACTA2 PE=2 SV=1	sp|P62740|ACTA_RABIT (+4)	42 kDa	14	18
Glyceraldehyde-3-phosphate dehydrogenase OS=Oryctolagus cuniculus OX=9986 GN=GAPDH PE=1 SV=3	sp|P46406|G3P_RABIT (+2)	36 kDa	12	18
Fructose-bisphosphate aldolase A OS=Oryctolagus cuniculus OX=9986 GN=ALDOA PE=1 SV=2	sp|P00883|ALDOA_RABIT (+1)	39 kDa	5	15
Pyruvate kinase PKM OS=Oryctolagus cuniculus OX=9986 GN=PKM PE=1 SV=4	sp|P11974|KPYM_RABIT	58 kDa	0	12
Glycogen phosphorylase, muscle form OS=Oryctolagus cuniculus OX=9986 GN=PYGM PE=1 SV=3	sp|P00489|PYGM_RABIT (+2)	97 kDa	7	10
Albumin OS=Oryctolagus cuniculus OX=9986 GN=ALB PE=1 SV=1	tr|G1U9S2|G1U9S2_RABIT	69 kDa	4	10
Creatine kinase M-type OS=Oryctolagus cuniculus OX=9986 GN=CKM PE=1 SV=1	sp|P00563|KCRM_RABIT	43 kDa	6	9
Beta-enolase OS=Oryctolagus cuniculus OX=9986 GN=ENO3 PE=1 SV=4	sp|P25704|ENOB_RABIT	47 kDa	6	9
Four and a half LIM domains 1 OS=Oryctolagus cuniculus OX=9986 GN=FHL1 PE=4 SV=1	tr|A0A5F9DLR9|A0A5F9DLR9_RABIT (+1)	34 kDa	3	9
Ryanodine receptor 1 OS=Oryctolagus cuniculus OX=9986 GN=RYR1 PE=1 SV=1	sp|P11716|RYR1_RABIT	565 kDa	5	7
Phosphopyruvate hydratase OS=Oryctolagus cuniculus OX=9986 GN=ENO1 PE=3 SV=1	tr|A0A5F9CA66|A0A5F9CA66_RABIT (+4)	47 kDa	0	5
L-lactate dehydrogenase A chain OS=Oryctolagus cuniculus OX=9986 GN=LDHA PE=1 SV=3	sp|P13491|LDHA_RABIT (+2)	37 kDa	0	4
Laminin subunit beta 2 OS=Oryctolagus cuniculus OX=9986 GN=LAMB2 PE=4 SV=1	tr|G1SN83|G1SN83_RABIT	196 kDa	0	4
ATP synthase subunit beta OS=Oryctolagus cuniculus OX=9986 GN=ATP5F1B PE=3 SV=3	tr|G1SQA8|G1SQA8_RABIT	56 kDa	0	4
Phosphoglycerate kinase OS=Oryctolagus cuniculus OX=9986 PE=3 SV=2	tr|G1T7Z6|G1T7Z6_RABIT (+1)	45 kDa	0	4
Triosephosphate isomerase OS=Oryctolagus cuniculus OX=9986 GN=TPI1 PE=1 SV=3	sp|P00939|TPIS_RABIT	27 kDa	0	3
Phosphoglucomutase-1 OS=Oryctolagus cuniculus OX=9986 GN=PGM1 PE=1 SV=2	sp|P00949|PGM1_RABIT (+1)	62 kDa	0	3
Glycerol-3-phosphate dehydrogenase [NAD(+)], cytoplasmic OS=Oryctolagus cuniculus OX=9986 GN=GPD1 PE=3 SV=2	sp|P08507|GPDA_RABIT	38 kDa	0	3
Glycogen debranching enzyme OS=Oryctolagus cuniculus OX=9986 GN=AGL PE=1 SV=1	sp|P35574|GDE_RABIT (+2)	178 kDa	0	3
Collagen type XV alpha 1 chain OS=Oryctolagus cuniculus OX=9986 GN=COL15A1 PE=4 SV=1	tr|A0A5F9CZS9|A0A5F9CZS9_RABIT (+2)	128 kDa	0	3
ATP-dependent 6-phosphofructokinase, muscle type OS=Oryctolagus cuniculus OX=9986 GN=PFKM PE=1 SV=3	sp|P00511|PFKAM_RABIT (+4)	85 kDa	0	2
ATP synthase subunit alpha OS=Oryctolagus cuniculus OX=9986 GN=ATP5F1A PE=3 SV=1	tr|G1SKT4|G1SKT4_RABIT	60 kDa	0	2
Malate dehydrogenase OS=Oryctolagus cuniculus OX=9986 GN=MDH2 PE=3 SV=2	tr|G1T765|G1T765_RABIT (+1)	33 kDa	0	2
TITIN protein OS=Oryctolagus cuniculus OX=9986 PE=4 SV=1	tr|A0A5F9CZ37|A0A5F9CZ37_RABIT (+1)	63 kDa	4	0
Histone H1.4 OS=Oryctolagus cuniculus OX=9986 GN=H1-4 PE=1 SV=2	sp|P02252|H14_RABIT (+1)	22 kDa	2	0
Troponin C, slow skeletal and cardiac muscles OS=Oryctolagus cuniculus OX=9986 GN=TNNC1 PE=1 SV=1	sp|P02591|TNNC1_RABIT	18 kDa	2	0
Elongation factor 1-alpha 1 OS=Oryctolagus cuniculus OX=9986 GN=EEF1A1 PE=1 SV=1	sp|P68105|EF1A1_RABIT (+1)	50 kDa	2	0
Myosin-4 OS=Oryctolagus cuniculus OX=9986 GN=MYH4 PE=3 SV=1	tr|A0A5F9D4X4|A0A5F9D4X4_RABIT (+2)	223 kDa	2	0

## Sheet: Blank Control
Run Against Mouse
Identified Proteins (12)	Accession Number	Molecular Weight	SpC 68117			68117
Trypsin - Sus scrofa (Pig).	IPI:CON_Trypsin|SWISS-PROT:P00761|TRYP_PIG	24 kDa	44		Total number of proteins identified	12
Tax_Id=9606 Gene_Symbol=KRT1 Keratin, type II cytoskeletal 1	IPI:CON_00220327.3|SWISS-PROT:P04264	66 kDa	32		Total number of spectra matching	241
Tax_Id=9606 Gene_Symbol=KRT6B Keratin, type II cytoskeletal 6B	IPI:CON_00293665.7|SWISS-PROT:P04259 (+1)	60 kDa	27		Total number of unique peptides	96
Tax_Id=9606 Gene_Symbol=KRT5 Keratin, type II cytoskeletal 5	IPI:CON_00009867.3|SWISS-PROT:P13647	62 kDa	24
Tax_Id=9606 Gene_Symbol=KRT2 Keratin, type II cytoskeletal 2 epidermal	IPI:CON_00021304.1|SWISS-PROT:P35908	66 kDa	19
Tax_Id=9606 Gene_Symbol=KRT16 Keratin, type I cytoskeletal 16	IPI:CON_00217963.3|SWISS-PROT:P08779 (+1)	51 kDa	17
Tax_Id=9606 Gene_Symbol=KRT14 Keratin, type I cytoskeletal 14	IPI:CON_00384444.5|SWISS-PROT:P02533	52 kDa	18
Tax_Id=9606 Gene_Symbol=KRT10 Keratin, type I cytoskeletal 10	IPI:CON_00009865.2|SWISS-PROT:P13645	60 kDa	19
Tax_Id=9606 Gene_Symbol=KRT9 Keratin, type I cytoskeletal 9	IPI:CON_00019359.3|SWISS-PROT:P35527	62 kDa	16
Tax_Id=9606 Gene_Symbol=KRT17 Keratin, type I cytoskeletal 17	IPI:CON_IPI00450768.7|SWISS-PROT:Q04695	48 kDa	13
Complement factor B OS=Mus musculus OX=10090 GN=Cfb PE=1 SV=2	sp|P04186|CFAB_MOUSE	85 kDa	7
Tax_Id=9606 Gene_Symbol=KRT27 Keratin, type I cytoskeletal 27	IPI:CON_IPI00328103.3|SWISS-PROT:Q7Z3Y8	50 kDa	5
Run Against Rabbit
Identified Proteins (14)	Accession Number	Molecular Weight	SpC 68117			68117
Complement factor B OS=Oryctolagus cuniculus OX=9986 PE=4 SV=2	tr|G1SS69|G1SS69_RABIT	85 kDa	72		Total number of proteins identified	14
Trypsin - Sus scrofa (Pig).	IPI:CON_Trypsin|SWISS-PROT:P00761|TRYP_PIG	24 kDa	43		Total number of spectra matching	291
Tax_Id=9606 Gene_Symbol=KRT1 Keratin, type II cytoskeletal 1	IPI:CON_00220327.3|SWISS-PROT:P04264	66 kDa	29		Total number of unique peptides	100
Tax_Id=9606 Gene_Symbol=KRT6B Keratin, type II cytoskeletal 6B	IPI:CON_00293665.7|SWISS-PROT:P04259 (+1)	60 kDa	25
Tax_Id=9606 Gene_Symbol=KRT5 Keratin, type II cytoskeletal 5	IPI:CON_00009867.3|SWISS-PROT:P13647	62 kDa	22
Tax_Id=9606 Gene_Symbol=KRT10 Keratin, type I cytoskeletal 10	IPI:CON_00009865.2|SWISS-PROT:P13645	60 kDa	20
Tax_Id=9606 Gene_Symbol=KRT14 Keratin, type I cytoskeletal 14	IPI:CON_00384444.5|SWISS-PROT:P02533	52 kDa	19
Tax_Id=9606 Gene_Symbol=KRT2 Keratin, type II cytoskeletal 2 epidermal	IPI:CON_00021304.1|SWISS-PROT:P35908	66 kDa	17
Tax_Id=9606 Gene_Symbol=KRT16 Keratin, type I cytoskeletal 16	IPI:CON_00217963.3|SWISS-PROT:P08779 (+1)	51 kDa	17
Tax_Id=9606 Gene_Symbol=KRT9 Keratin, type I cytoskeletal 9	IPI:CON_00019359.3|SWISS-PROT:P35527	62 kDa	15
Tax_Id=9606 Gene_Symbol=KRT27 Keratin, type I cytoskeletal 27	IPI:CON_IPI00328103.3|SWISS-PROT:Q7Z3Y8	50 kDa	5
Chromosome 1 open reading frame 68 OS=Oryctolagus cuniculus OX=9986 GN=C1orf68 PE=4 SV=2	tr|G1T8X6|G1T8X6_RABIT	27 kDa	3
Desmoplakin OS=Oryctolagus cuniculus OX=9986 GN=DSP PE=3 SV=1	tr|A0A5F9CRC2|A0A5F9CRC2_RABIT (+1)	258 kDa	2
RNA binding motif protein 12B OS=Oryctolagus cuniculus OX=9986 GN=RBM12B PE=4 SV=2	tr|G1SZ41|G1SZ41_RABIT	101 kDa	2
